# Supplementary material for: Not All Teens Scroll the Same: Patterns and Variation in Adolescent Social Media Behavior
Source: Research Square preprint supplement (doi:10.21203/rs.3.rs-8653667/v1), 2026-02-09
Supplement: Supplementary file 1 [file 0e5d575554184d70aeb39cd1.docx]

**Supplementary Table 1.** *Results from preliminary analyses in outcome variables.*

| **Outcome Variable** | **ICC** | **Skew** | **Kurtosis** |
| --- | --- | --- | --- |
| Communicating with known people | .012 | -2.31 | 5.53 |
| Communicating with people met online | .035 | 1.17 | 0.08 |
| Posting/Sharing content | .027 | 1.31 | 0.68 |
| Viewing/scrolling others content | .112 | -1.45 | 1.24 |
| Social validation | .023 | 0.20 | -1.19 |
| Social comparison | .024 | 0.69 | -0.64 |
| Emotional valence of response (disappointment) | .047 | 0.31 | -1.16 |
| Expectation of response | .064 | 0.03 | -1.17 |
| Emotional valence of response (neutrality) | .019 | -0.31 | -1.03 |
| Posting negative personal content | .077 | 2.05 | 3.78 |
| Posting multiple times a day | .026 | 1.12 | 0.11 |

Note: *N* = 3860.

**Supplementary Table 2.** *Results from generalized mixed models for skewed variables.*

| **Predictor** | ***B*** | **Lower CI** | **Upper CI** | ***p*** |
| --- | --- | --- | --- | --- |
| *Communicating with people you know in real life* |  |  |  |  |
| **Females vs. Males** | **-0.06** | **-0.10** | **-0.03** | **<.001** |
| **Gender Diverse vs. Males** | **0.11** | **0.02** | **0.20** | **.015** |
| **Heterosexual vs. Sexuality Diverse** | **-0.15** | **-0.19** | **-0.12** | **<.001** |
| **Neurotypical vs. Neurodivergent** | **-0.10** | **-0.16** | **-0.05** | **<.001** |
| English Speaking vs. CALD | 0.01 | -0.04 | 0.06 | .595 |
| Metro vs. Regional | -0.02 | -0.06 | 0.02 | .409 |
| IRSAD | -0.00 | 0.00 | 0.00 | .111 |
| Negative Family Interactions | -0.00 | -0.02 | 0.02 | .665 |
| **Distress** | **0.01** | **0.01** | **0.01** | **<.001** |
| **Loneliness** | **0.02** | **0.02** | **0.03** | **<.001** |
| **School Connectedness** | **-0.04** | **-0.04** | **0.03** | **<.001** |

| *Posting negative self content* |  |  |  |  |
| --- | --- | --- | --- | --- |
| Females vs. Males | 0.04 | -0.05 | 0.14 | .370 |
| Gender Diverse vs. Males | 0.00 | -0.03 | 0.04 | .913 |
| Heterosexual vs. Sexuality Diverse | -0.04 | -0.08 | 0.00 | .080 |
| **Neurotypical vs. Neurodivergent** | **-0.08** | **-0.14** | **-0.02** | **.005** |
| English Speaking vs. CALD | 0.05 | -0.01 | 0.10 | .088 |
| **Metro vs. Regional** | **-0.12** | **-0.17** | **-0.08** | **<.001** |
| **IRSAD** | **-0.00** | **-0.00** | **0.00** | **<.001** |
| **Negative Family Interactions** | **0.13** | **0.11** | **0.15** | **<.001** |
| **Distress** | **0.01** | **0.01** | **0.02** | **<.001** |
| **Loneliness** | **0.02** | **0.01** | **0.02** | **<.001** |
| **School Connectedness** | **-0.03** | **-0.03** | **-0.02** | **<.001** |

*Note: N* = 3860. The generalized mixed model assessing associations with outcome variable “*Communicating with people known in real life*” used a reflected variable due to established limitations with left skewed variables.
